# Supplementary material for: The physico-geometrical reaction pathway and kinetics of multistep thermal dehydration of calcium chloride dihydrate in a dry nitrogen stream
Source: Royal Society of Chemistry journal article supplement (doi:10.1039/d4cp00790e), 2024-01-01
Supplement: d4cp00790e1.pdf [file d4cp00790e1.pdf]

## Supplementary Information

# Physico-geometrical reaction pathway and kinetics of multistep thermal dehydration of calcium chloride dihydrate in a dry nitrogen stream

Kazuki Kato and Nobuyoshi Koga\*

Department of Science Education, Division of Educational Sciences, Graduate School of Humanities and Social Sciences, Hiroshima University, 1-1-1 Kagamiyama, Higashi-Hiroshima 739-8524, Japan

## Contents

|                                                                                                                                                                                                                                                                                                                                                  |    |
|--------------------------------------------------------------------------------------------------------------------------------------------------------------------------------------------------------------------------------------------------------------------------------------------------------------------------------------------------|----|
| S1. Sample characterization .....                                                                                                                                                                                                                                                                                                                | s3 |
| <b>Figure S1.</b> XRD pattern of the sample.....                                                                                                                                                                                                                                                                                                 | s3 |
| <b>Figure S2.</b> FTIR spectrum of the sample. ....                                                                                                                                                                                                                                                                                              | s3 |
| <b>Table S1.</b> Assignment of infrared absorption peaks .....                                                                                                                                                                                                                                                                                   | s3 |
| <b>Figure S3.</b> Particle morphology of the CC-DH sample (300–500 $\mu\text{m}$ ).....                                                                                                                                                                                                                                                          | s3 |
| <b>Figure S4.</b> Deliquesce of the CC-DH sample (300–500 $\mu\text{m}$ ) observed by standing sample particles at room temperature in an ambient atmosphere: (a) 0, (b) 1, (c) 3, (d) 5, (e) 10, and (f) 15 min.....                                                                                                                            | s3 |
| <b>Figure S5.</b> Dehydration of the partially deliquesced CC-DH particle surface observed by standing the sample at 303 K in a stream of dry $\text{N}_2$ ( $q_v = 100 \text{ cm}^3 \text{ min}^{-1}$ ): (a) 0, (b) 3, (c) 6, and (d) 12 min.....                                                                                               | s4 |
| S2. Two-step kinetic modeling .....                                                                                                                                                                                                                                                                                                              | s4 |
| Weibull function .....                                                                                                                                                                                                                                                                                                                           | s4 |
| <b>Figure S6.</b> A typical result of MDA for separating the DTG curve for the thermal dehydration of CC-DH to form CC-AH via CC-MH into two DTG peaks using MDA.....                                                                                                                                                                            | s4 |
| <b>Figure S7.</b> Kinetic curves of each mass loss step of the thermal dehydration of CC-DH to form CC-AH via CC-MH at different $\beta$ : (a) the first and (b) second mass loss steps.....                                                                                                                                                     | s4 |
| <b>Figure S8.</b> Results of the formal kinetic analysis for each mass loss step separated by MDA: (a) Friedman plots for the first mass loss step, (b) Friedman plots for the second mass loss step, (c) $E_{a,i}$ values at different $\alpha_i$ values, and (d) experimental master plots of $(d\alpha_i/d\theta_i)$ versus $\alpha_i$ . .... | s5 |
| <b>Table S2.</b> Kinetic parameters for the first and second mass loss steps determined by MDA to separate into two mass loss steps and formal kinetic analysis of the separated mass loss steps.....                                                                                                                                            | s6 |
| <b>Figure S9.</b> Typical KDA results for the thermal dehydration of CC-DH to form CC-AH assuming an independent two-step process under linear nonisothermal conditions at various $\beta$ , except for $\beta = 5 \text{ K min}^{-1}$ shown in Figure 5(a).....                                                                                 | s7 |
| <b>Figure S10.</b> Typical KDA results for the thermal dehydration of CC-DH to form CC-AH assuming an independent two-step process under CRTA conditions at various $C$ , except for $C = 10 \mu\text{g min}^{-1}$ shown in Figure 5(b). ....                                                                                                    | s8 |

\* Corresponding author. E-mail: nkoga@hiroshima-u.ac.jp

## Supplementary Information

|                                                                                                                                                                                                                                                                                                                                                                                                                                                                                                  |     |
|--------------------------------------------------------------------------------------------------------------------------------------------------------------------------------------------------------------------------------------------------------------------------------------------------------------------------------------------------------------------------------------------------------------------------------------------------------------------------------------------------|-----|
| <b>Figure S11.</b> Kinetic curves under linear nonisothermal conditions at different $\beta$ for each reaction step obtained from the results of KDA based on the two-step kinetic modeling: (a) first and (b) second reaction steps. ....                                                                                                                                                                                                                                                       | s9  |
| <b>Figure S12.</b> Kinetic curves under CRTA conditions at different $C$ for each reaction step obtained from the results of KDA based on the two-step kinetic modeling: (a) first and (b) second reaction steps. ....                                                                                                                                                                                                                                                                           | s9  |
| <b>S3. Three-step kinetic modeling</b> .....                                                                                                                                                                                                                                                                                                                                                                                                                                                     | s10 |
| <b>Figure S13.</b> Typical KDA results for the thermal dehydration of CC-DH to form CC-AH assuming an independent three-step process under linear nonisothermal conditions at various $\beta$ , except for $\beta = 5 \text{ K min}^{-1}$ shown in Figure 8(a). ....                                                                                                                                                                                                                             | s10 |
| <b>Figure S14.</b> Typical KDA results for the thermal dehydration of CC-DH to form CC-AH assuming an independent three-step process under CRTA conditions at various $C$ , except for $C = 10 \text{ } \mu\text{g min}^{-1}$ shown in Figure 8(b). ....                                                                                                                                                                                                                                         | s11 |
| <b>Figure S15.</b> Typical KDA results for the first two reaction steps of the thermal dehydration of CC-DH to form CC-AH assuming an independent three-step process under isothermal conditions at various $T$ , except for $T = 331 \text{ K}$ shown in Figure 8(c). ....                                                                                                                                                                                                                      | s12 |
| <b>Figure S16.</b> Kinetic curves for the first reaction steps in the three-step modeling of the thermal dehydration of CC-DH to form CC-AH under different heating program modes: (a) linear nonisothermal, (b) CRTA, and (c) isothermal modes. ....                                                                                                                                                                                                                                            | s13 |
| <b>Figure S17.</b> Kinetic curves for the second reaction steps in the three-step modeling of the thermal dehydration of CC-DH to form CC-AH under different heating program modes: (a) linear nonisothermal, (b) CRTA, and (c) isothermal modes. ....                                                                                                                                                                                                                                           | s13 |
| <b>Figure S18.</b> Friedman plots at various $\alpha_i$ values for the first and second reaction steps in the three-step kinetic modeling: (a) first and (b) second reaction steps. ....                                                                                                                                                                                                                                                                                                         | s14 |
| <b>Figure S19.</b> TG–DTG curves for the thermal dehydration of CC-DH ( $m_0 = 3.03 \text{ mg}$ ) to form CC-AH recorded at a $\beta$ of $3 \text{ K min}^{-1}$ in a stream of wet $\text{N}_2$ ( $q_v = 200 \text{ cm}^3 \text{ min}^{-1}$ ) characterized by $p(\text{H}_2\text{O}) = 4.2 \text{ kPa}$ . Measurements were performed using a humidity-controlled TG system constructed by coupling TG–DTA (TG8122, Rigaku) and a humidity controller (me-40DP-2PHW, Micro Equipment Co.). .... | s14 |

## S1. Sample characterization

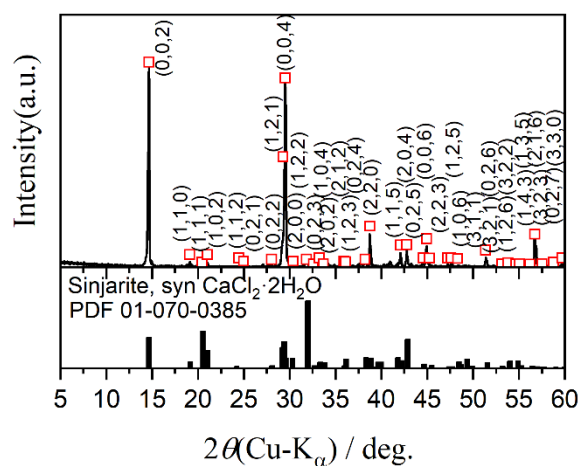

Figure S1. XRD pattern of the sample.

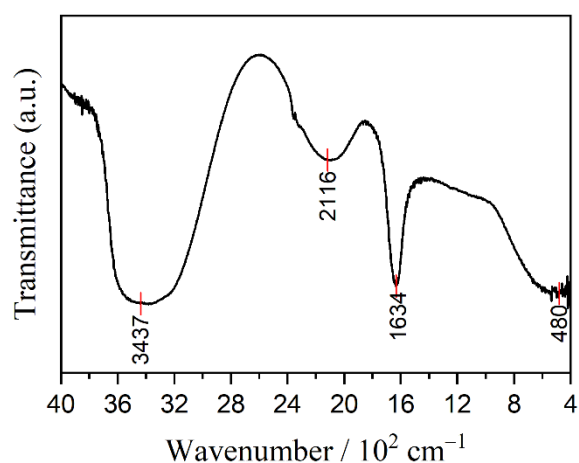

Figure S2. FTIR spectrum of the sample.

Table S1. Assignment of infrared absorption peaks

| Wavenumber / $\text{cm}^{-1}$ | Vibration mode                           |
|-------------------------------|------------------------------------------|
| 3437                          | O–H stretching band of crystalline water |
| 2116                          | symmetric O–H stretching vibration       |
| 1634                          | H–O–H bending band of crystalline water  |
| 480                           | Calcium chloride lattice                 |

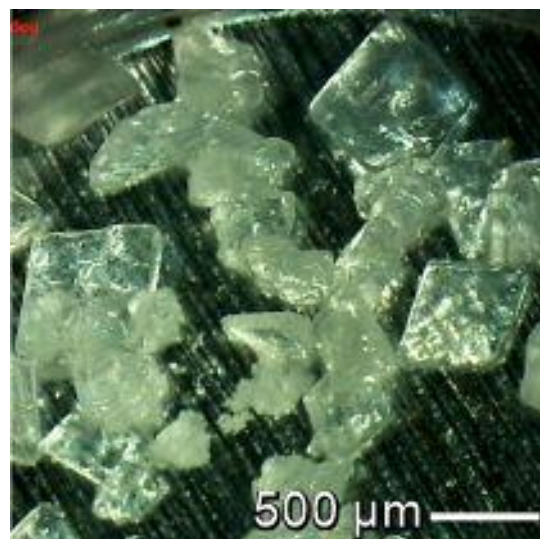Figure S3. Particle morphology of the CC-DH sample (300–500  $\mu\text{m}$ ).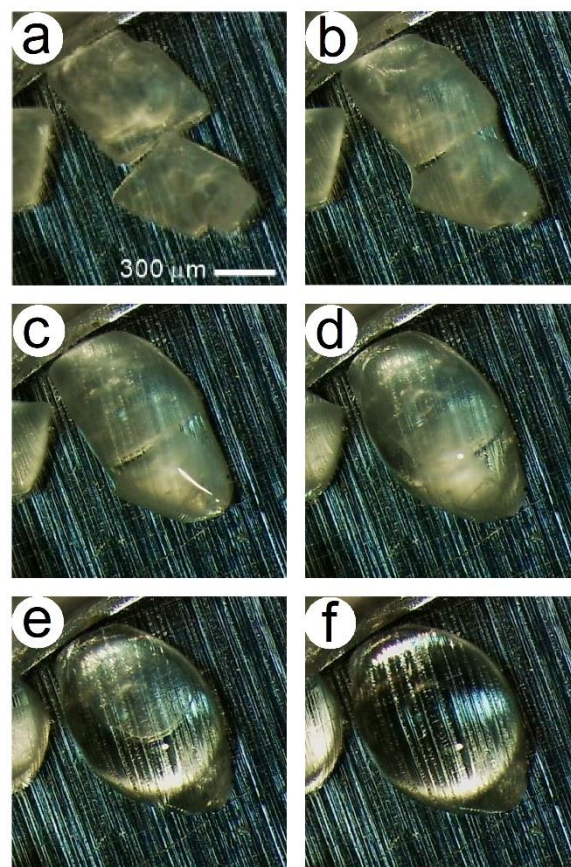Figure S4. Deliquescence of the CC-DH sample (300–500  $\mu\text{m}$ ) observed by standing sample particles at room temperature in an ambient atmosphere: (a) 0, (b) 1, (c) 3, (d) 5, (e) 10, and (f) 15 min.

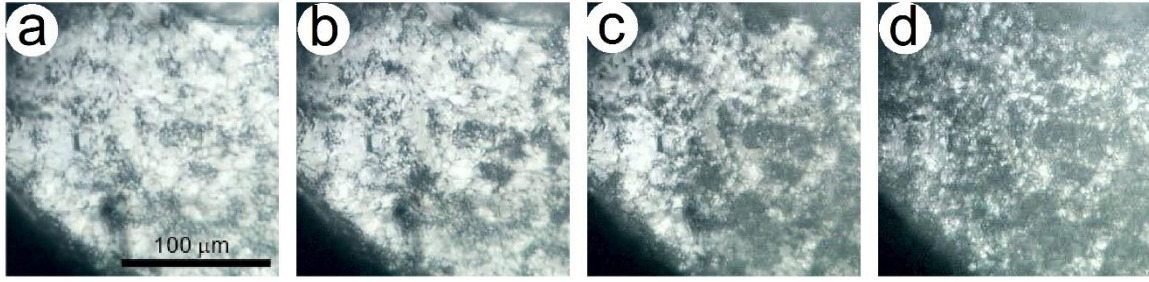

**Figure S5.** Dehydration of the partially deliquesced CC-DH particle surface observed by standing the sample at 303 K in a stream of dry  $N_2$  ( $q_v = 100 \text{ cm}^3 \text{ min}^{-1}$ ): (a) 0, (b) 3, (c) 6, and (d) 12 min.

## S2. Two-step kinetic modeling

Weibull function

$$F(t) = a_0 \left( \frac{a_3 - 1}{a_3} \right)^{\frac{1-a_3}{a_3}} \left\{ \frac{t - a_1}{a_2} + \left( \frac{a_3 - 1}{a_3} \right)^{\frac{1}{a_3}} \right\}^{a_3 - 1} \exp \left[ - \left\{ \frac{t - a_1}{a_2} + \left( \frac{a_3 - 1}{a_3} \right)^{\frac{1}{a_3}} \right\}^{a_3} + \frac{a_3 - 1}{a_3} \right] \quad (\text{S1})$$

where  $a_0$  is the amplitude,  $a_1$  is the center,  $a_2$  is the width, and  $a_3$  is the shape parameters.

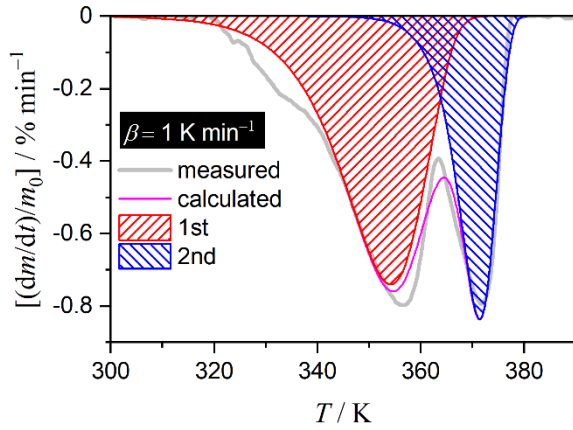

**Figure S6.** A typical result of MDA for separating the DTG curve for the thermal dehydration of CC-DH to form CC-AH via CC-MH into two DTG peaks using MDA.

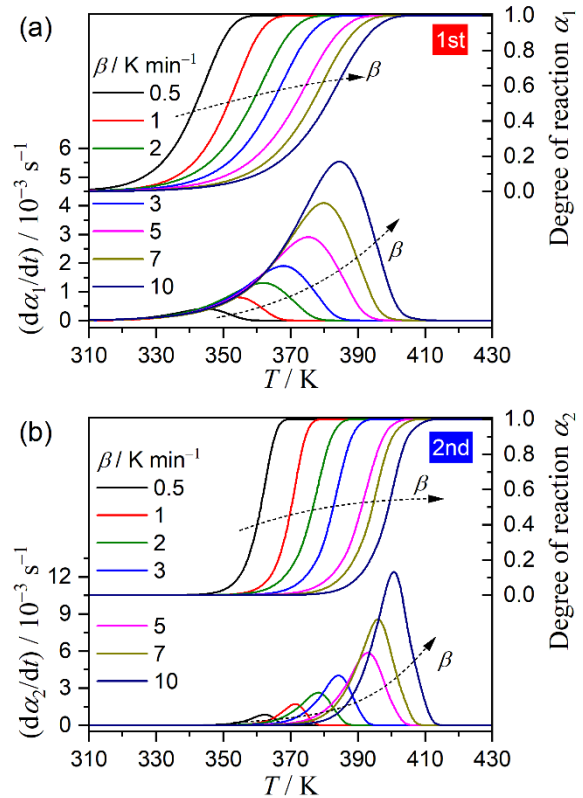

**Figure S7.** Kinetic curves of each mass loss step of the thermal dehydration of CC-DH to form CC-AH via CC-MH at different  $\beta$ : (a) first and (b) second mass loss steps.

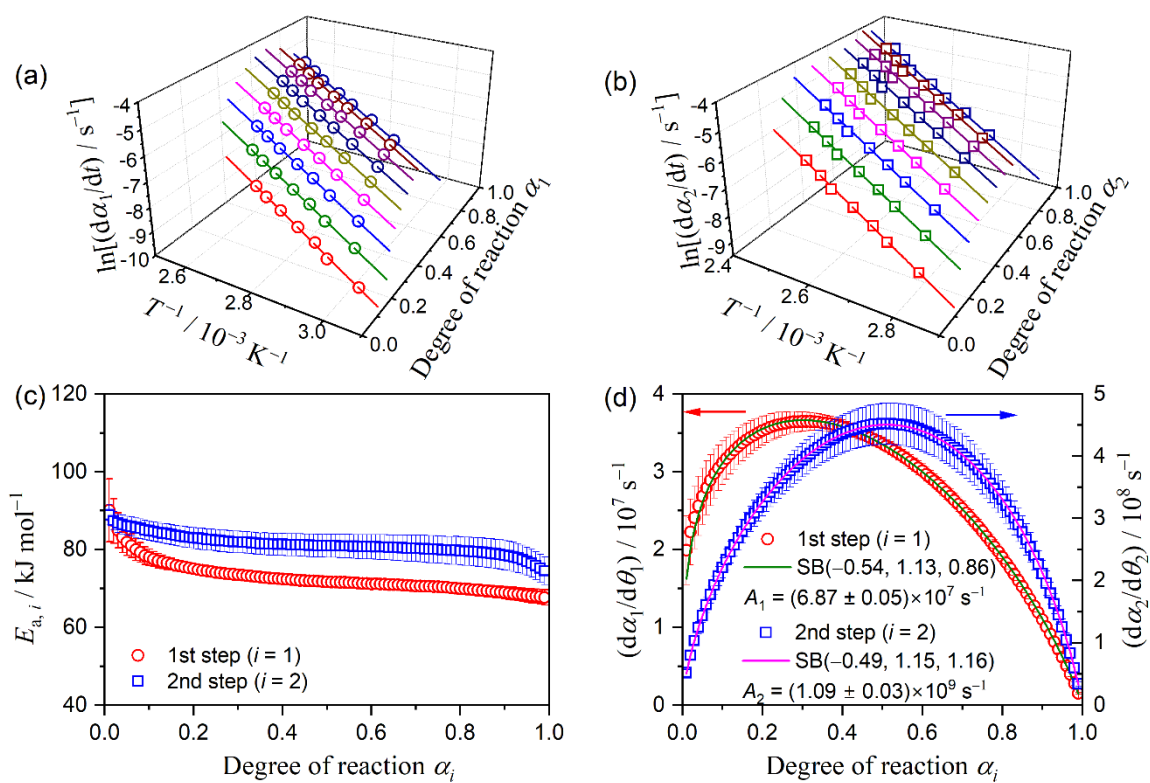

**Figure S8.** Results of the formal kinetic analysis for each mass loss step separated by MDA: (a) Friedman plots for the first mass loss step, (b) Friedman plots for the second mass loss step, (c)  $E_{a,i}$  values at different  $\alpha_i$  values, and (d) experimental master plots of  $(d\alpha_i/d\theta_i)$  versus  $\alpha_i$ .

**Table S2.** Kinetic parameters for the first and second mass loss steps determined by MDA to separate into two mass loss steps and formal kinetic analysis of the separated mass loss steps

| $i$ | $c_i$           | $E_{a,i} / \text{kJ mol}^{-1}, ^a$ | $\frac{d\alpha_i}{d\theta_i} = A_i f(\alpha_i)$ with $f(\alpha_i) = \alpha_i^{m_i} (1 - \alpha_i)^{n_i} [-\ln(1 - \alpha_i)]^{p_i}$ |                  |                 |                 |           |
|-----|-----------------|------------------------------------|-------------------------------------------------------------------------------------------------------------------------------------|------------------|-----------------|-----------------|-----------|
|     |                 |                                    | $A_i / \text{s}^{-1}$                                                                                                               | $m_i$            | $n_i$           | $p_i$           | $R^2, ^b$ |
| 1   | $0.67 \pm 0.02$ | $71.6 \pm 1.6$                     | $(6.87 \pm 0.05) \times 10^7$                                                                                                       | $-0.54 \pm 0.05$ | $1.13 \pm 0.02$ | $0.86 \pm 0.05$ | 0.9999    |
| 2   | $0.33 \pm 0.02$ | $81.2 \pm 1.5$                     | $(1.09 \pm 0.03) \times 10^9$                                                                                                       | $-0.49 \pm 0.03$ | $1.15 \pm 0.01$ | $1.16 \pm 0.03$ | 0.9999    |

<sup>a</sup> Averaged over  $0.2 \leq \alpha \leq 0.9$  for  $i = 1$  and  $0.1 \leq \alpha \leq 0.9$  for  $i = 2$ .<sup>b</sup> Determination coefficient of the nonlinear least-squares analysis.

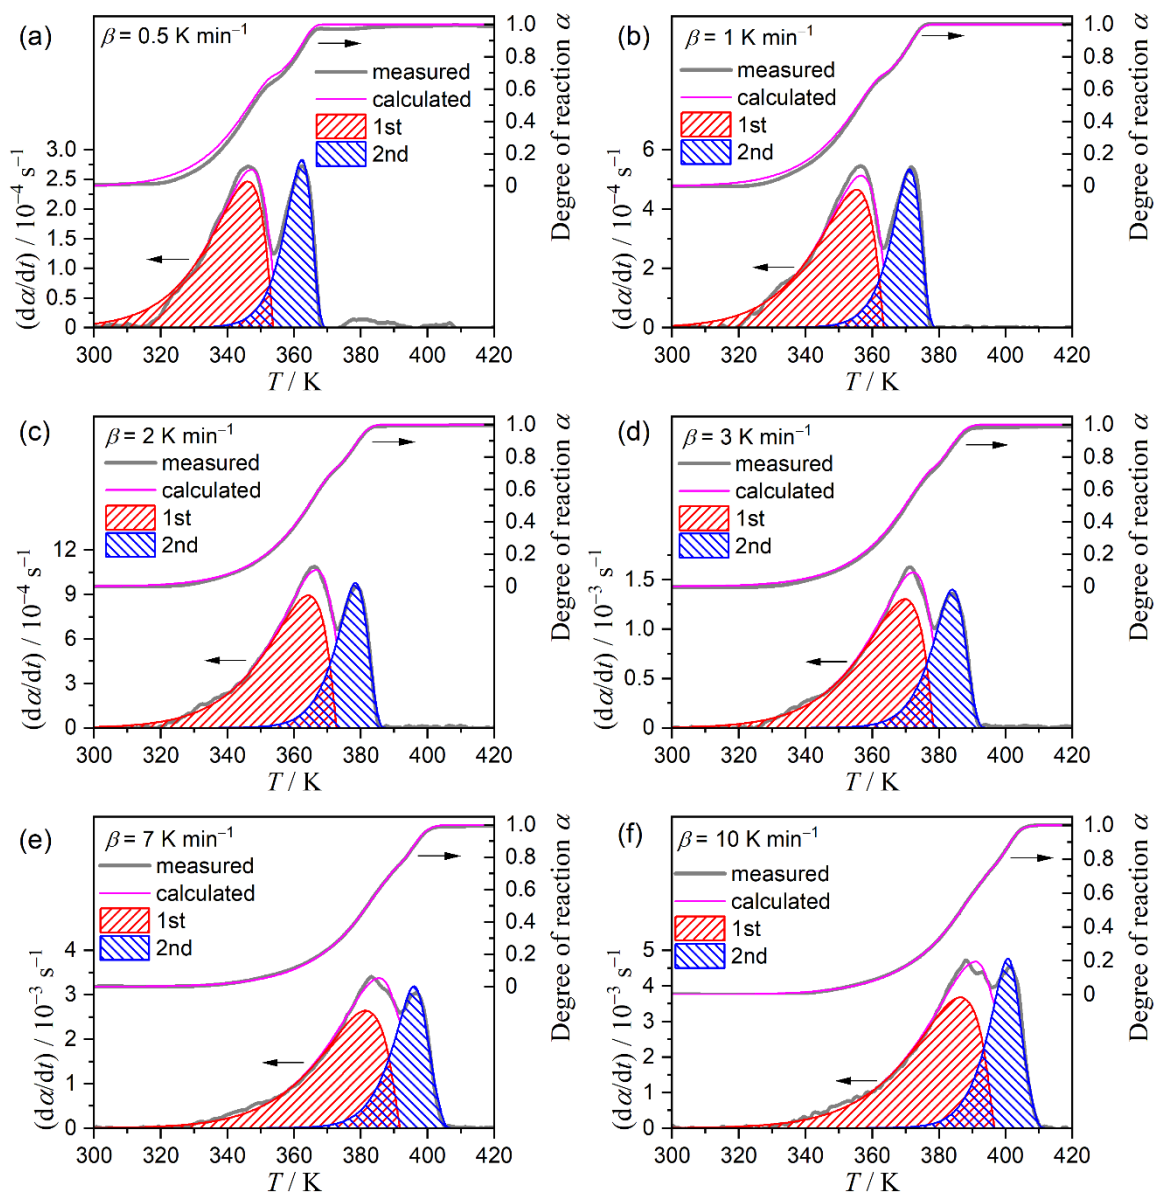

**Figure S9.** Typical KDA results for the thermal dehydration of CC-DH to form CC-AH assuming an independent two-step process under linear nonisothermal conditions at various  $\beta$ , except for  $\beta = 5 \text{ K min}^{-1}$  shown in Figure 5(a).

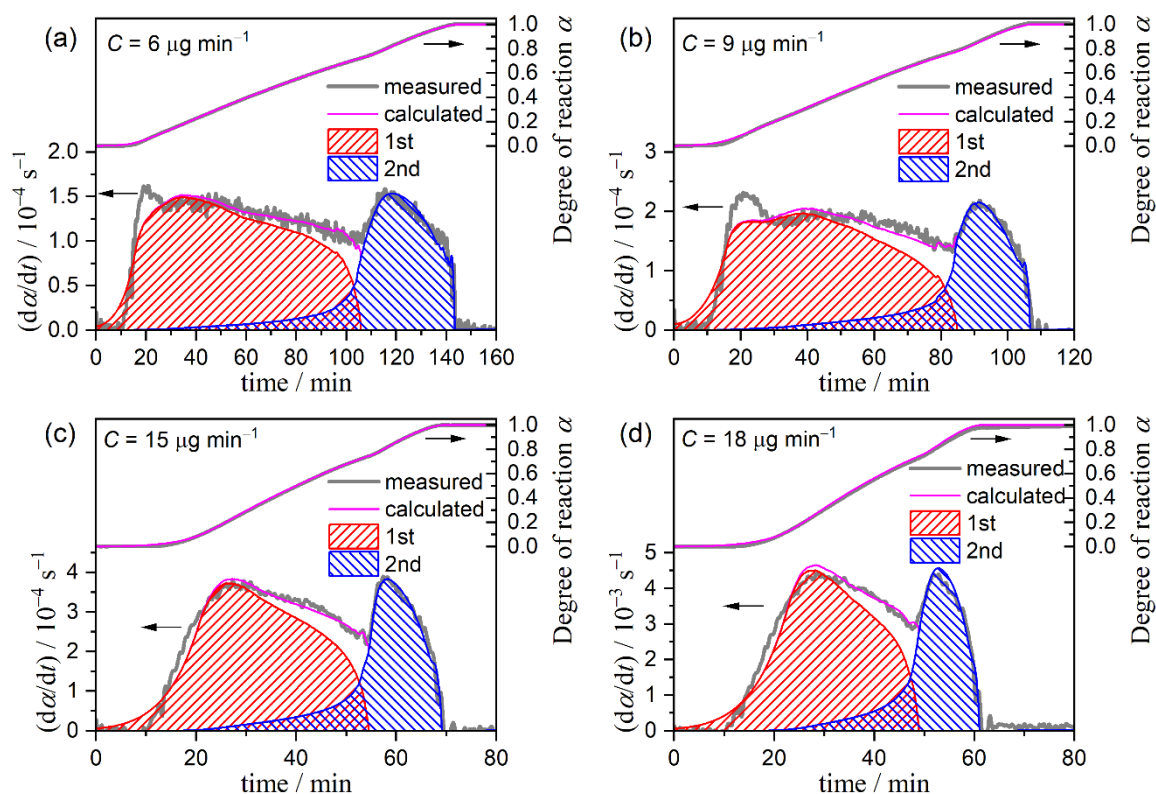

**Figure S10.** Typical KDA results for the thermal dehydration of CC-DH to form CC-AH assuming an independent two-step process under CRTA conditions at various  $C$ , except for  $C = 12 \mu\text{g min}^{-1}$  shown in Figure 5(b).

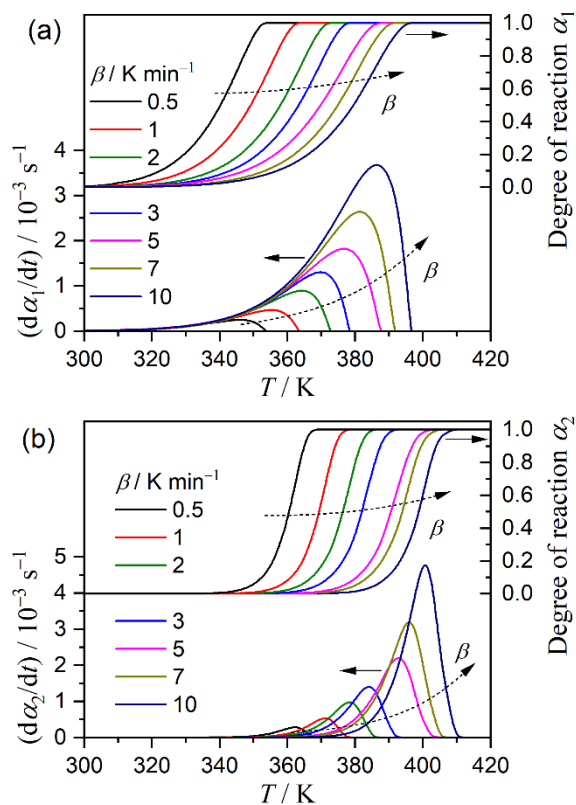

**Figure S11.** Kinetic curves under linear nonisothermal conditions at different  $\beta$  for each reaction step obtained from the results of KDA based on the two-step kinetic modeling: (a) first and (b) second reaction steps.

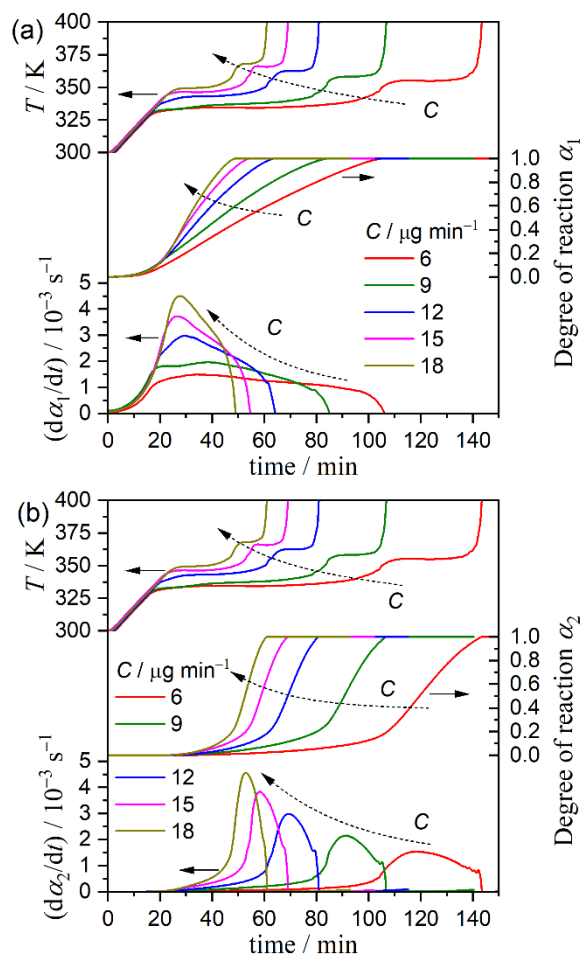

**Figure S12.** Kinetic curves under CRTA conditions at different  $C$  for each reaction step obtained from the results of KDA based on the two-step kinetic modeling: (a) first and (b) second reaction steps.

## S3. Three-step kinetic modeling

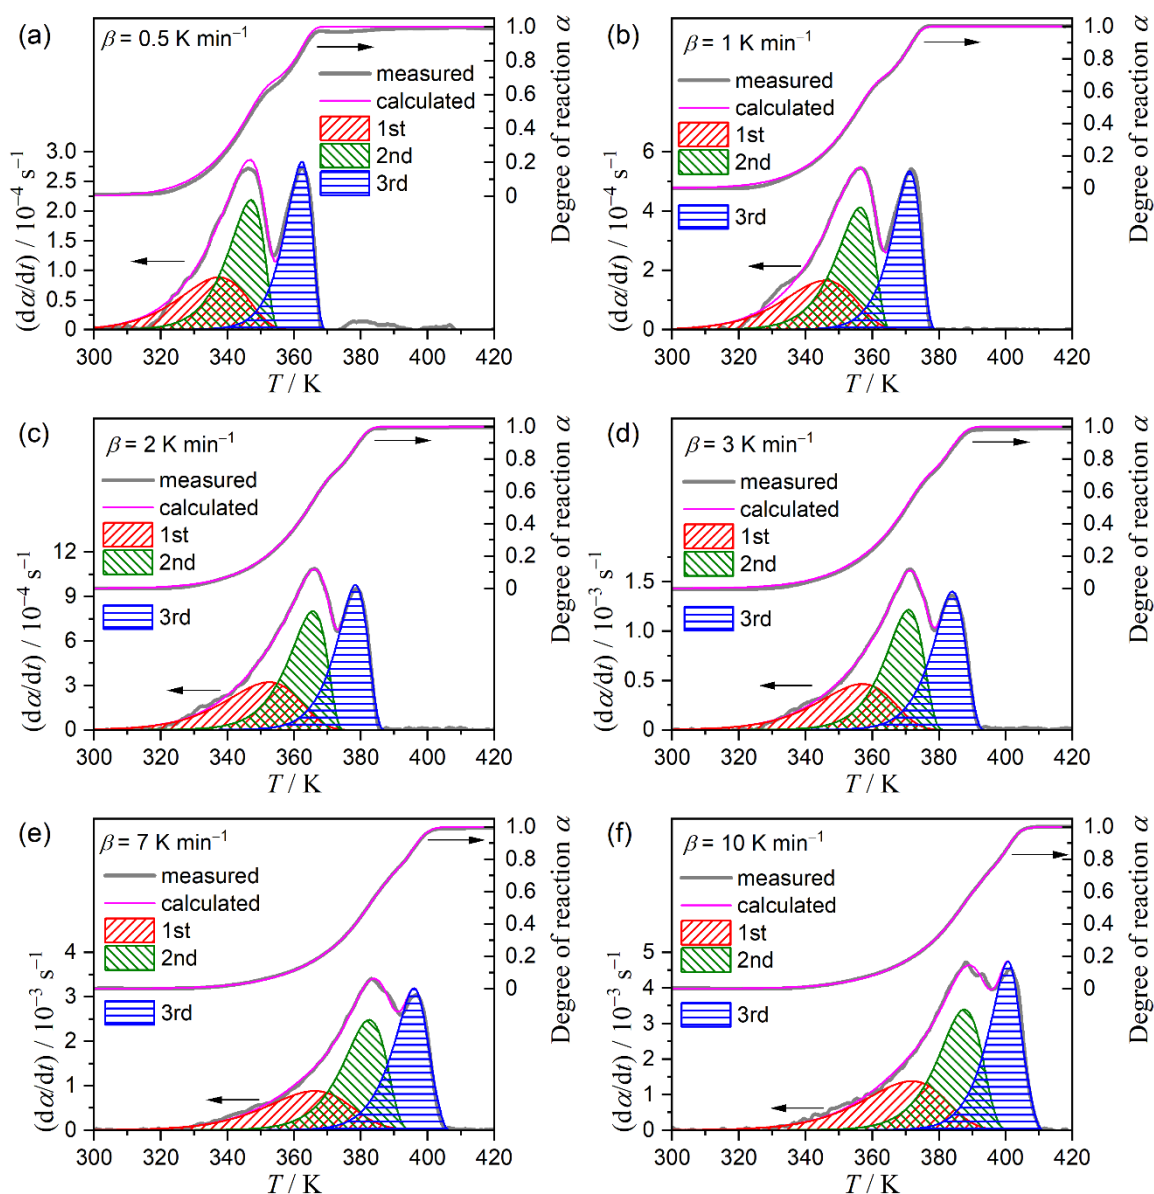

**Figure S13.** Typical KDA results for the thermal dehydration of CC-DH to form CC-AH assuming an independent three-step process under linear nonisothermal conditions at various  $\beta$ , except for  $\beta = 5 \text{ K min}^{-1}$  shown in Figure 8(a).

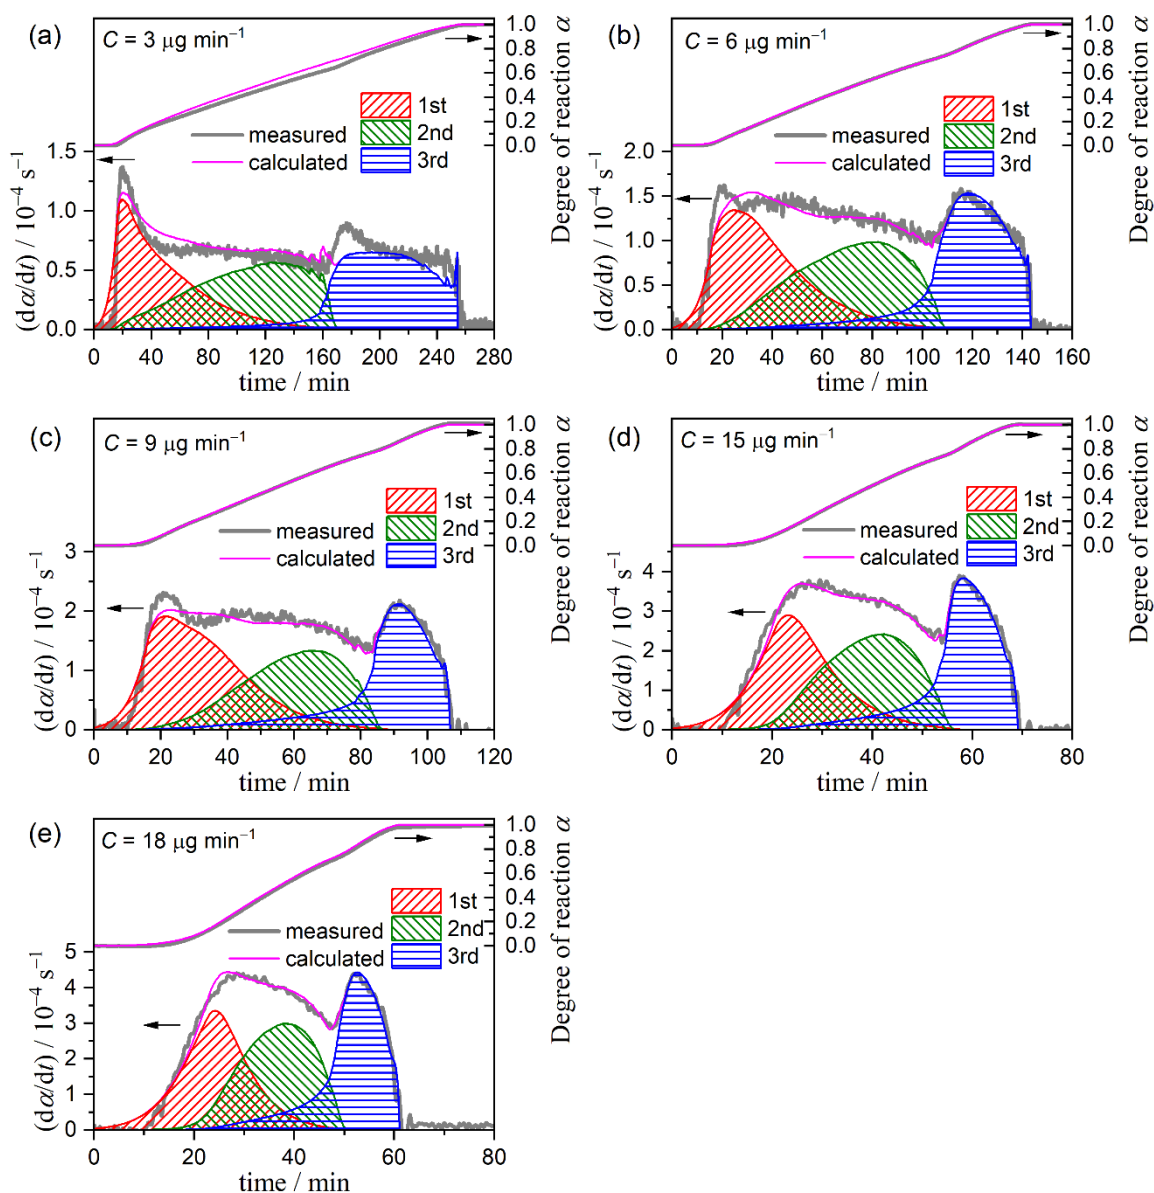

**Figure S14.** Typical KDA results for the thermal dehydration of CC-DH to form CC-AH assuming an independent three-step process under CRTA conditions at various  $C$ , except for  $C = 12 \mu\text{g min}^{-1}$  shown in Figure 8(b).

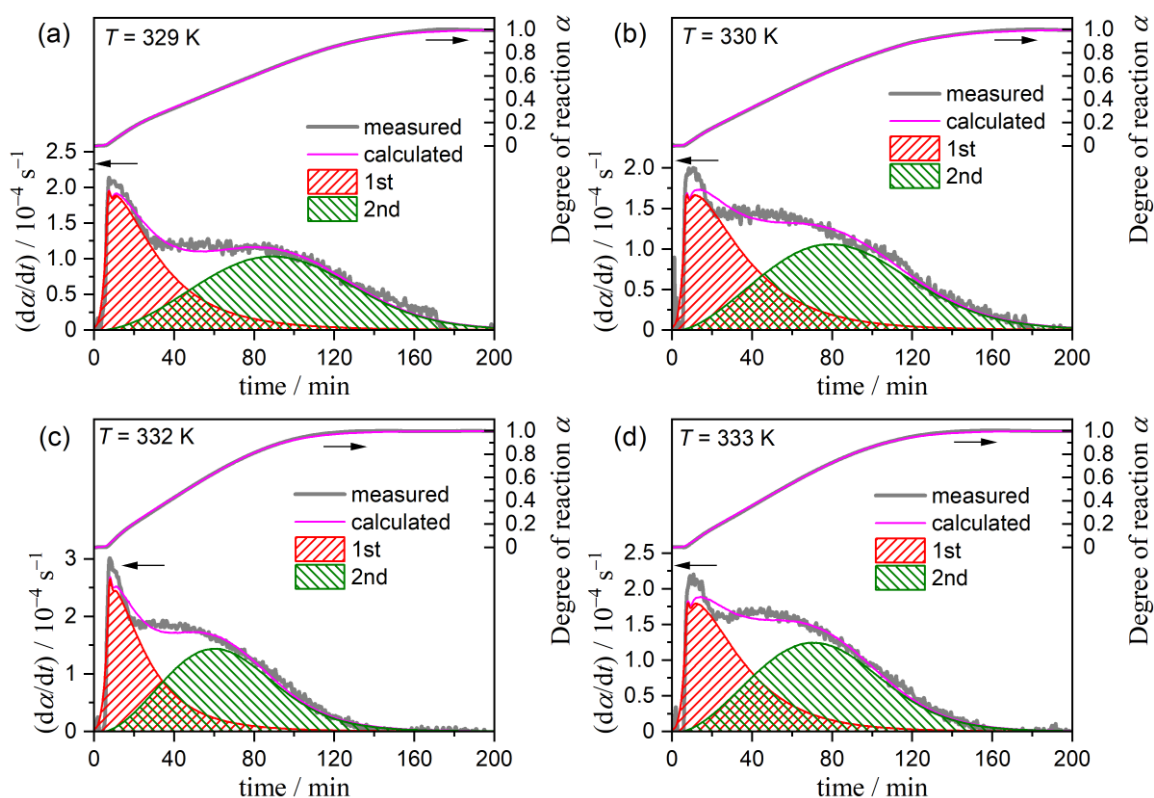

**Figure S15.** Typical KDA results for the first two reaction steps of the thermal dehydration of CC-DH to form CC-AH assuming an independent three-step process under isothermal conditions at various  $T$ , except for  $T = 331 \text{ K}$  shown in Figure 8(c).

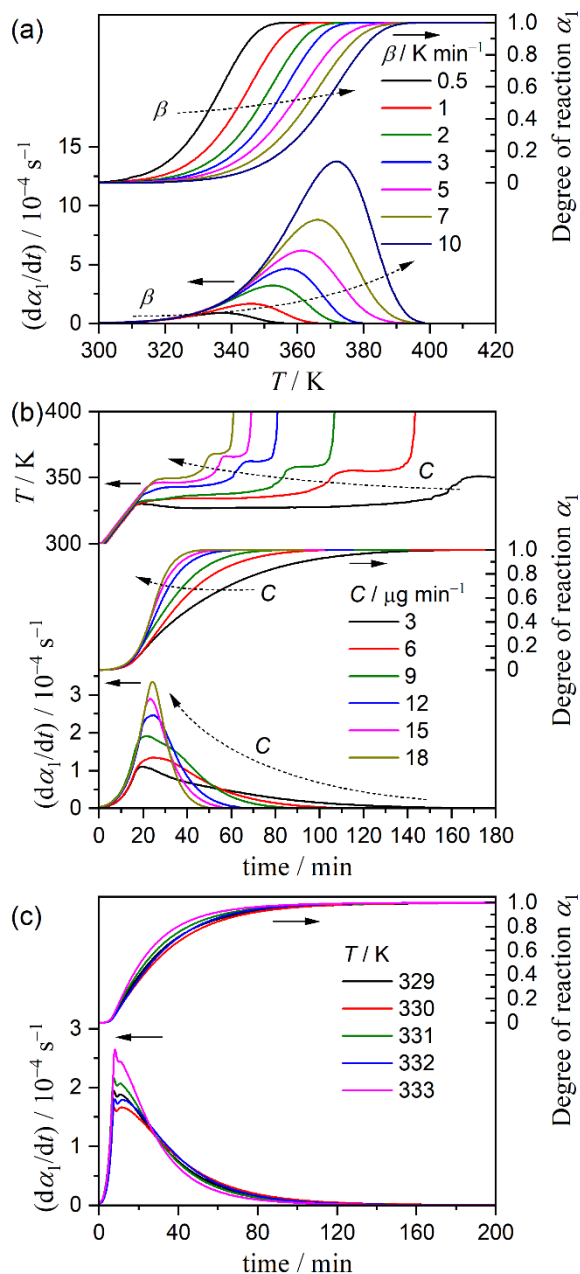

**Figure S16.** Kinetic curves for the first reaction steps in the three-step modeling of the thermal dehydration of CC-DH to form CC-AH under different heating program modes: (a) linear nonisothermal, (b) CRTA, and (c) isothermal modes.

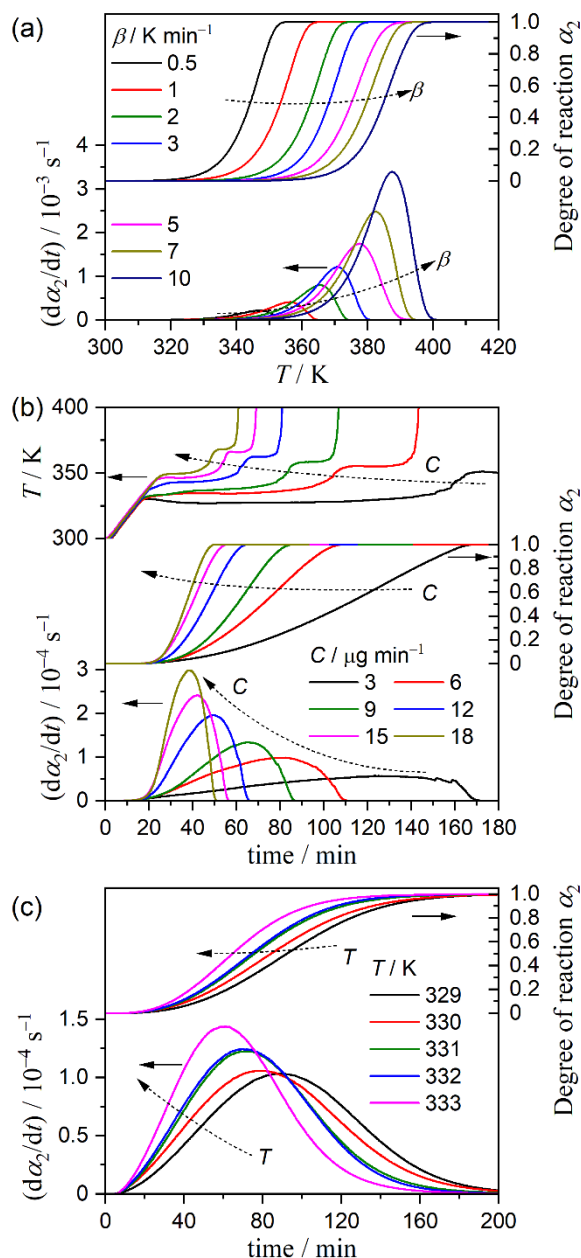

**Figure S17.** Kinetic curves for the second reaction steps in the three-step modeling of the thermal dehydration of CC-DH to form CC-AH under different heating program modes: (a) linear nonisothermal, (b) CRTA, and (c) isothermal modes.

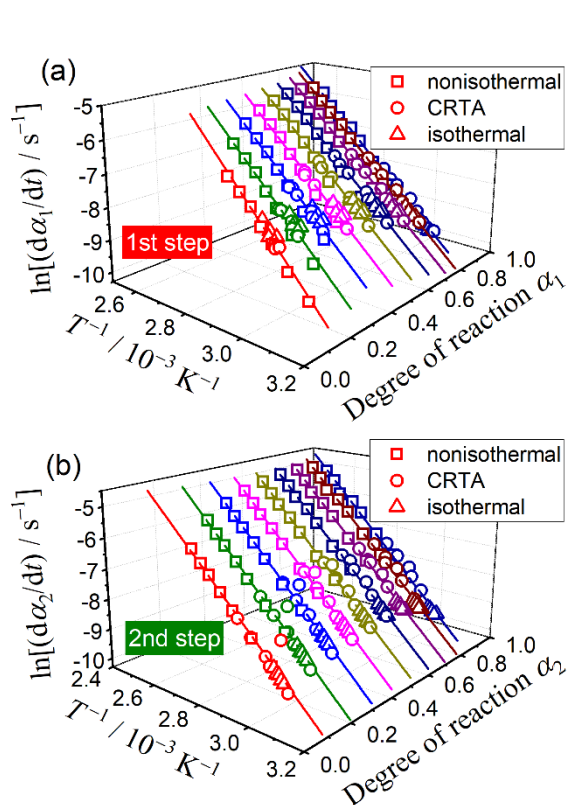

**Figure S18.** Friedman plots at various  $\alpha_i$  values for the first and second reaction steps in the three-step kinetic modeling: (a) first and (b) second reaction steps.

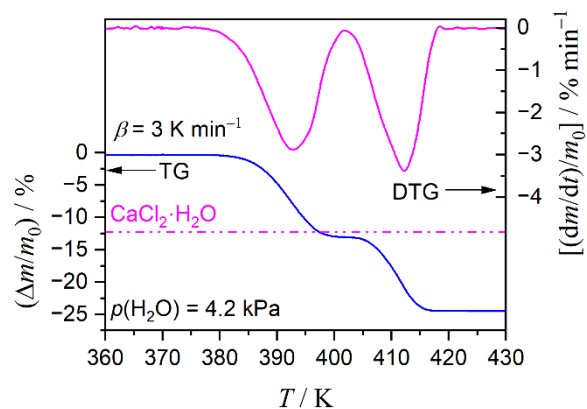

**Figure S19.** TG-DTG curves for the thermal dehydration of CC-DH ( $m_0 = 3.03$  mg) to form CC-AH recorded at a  $\beta$  of  $3 K min^{-1}$  in a stream of wet  $N_2$  ( $q_v = 200 cm^3 min^{-1}$ ) characterized by  $p(H_2O) = 4.2 kPa$ . Measurements were performed using a humidity-controlled TG system constructed by coupling TG-DTA (TG8122, Rigaku) and a humidity controller (me-40DP-2PHW, Micro Equipment Co.).
